# Supplementary material for: An enhanced extended hook method to realize tetranuclear metal clusters embedded in energetic metal–organic framework channels
Source: Royal Society of Chemistry journal article supplement (doi:10.1039/c6ce00892e), 2016-01-01
Supplement: c6ce00892e1.pdf [file c6ce00892e1.pdf]

## Supporting Information

### **An enhanced extended hook method to realize tetranuclear metal clusters embedded in energetic metal–organic framework channels**

*Yu Xiao<sup>ab</sup>, Shuai-Hua Wang<sup>a</sup>, Jian-Gang Xu<sup>ab</sup>, Cai Sun<sup>ab</sup>, Rong Li<sup>ab</sup>, Ya-Ping Zhao<sup>ab</sup>, Yong Yan<sup>ab</sup>, Fa-Kun Zheng<sup>\*a</sup>, Guo-Cong Guo<sup>a</sup>*

*<sup>a</sup> State Key Laboratory of Structural Chemistry, Fujian Institute of Research on the Structure of Matter, Chinese Academy of Sciences, Fuzhou, Fujian 350002, P. R. China*

*<sup>b</sup> University of Chinese Academy of Sciences, Beijing 100039, P. R. China*

#### **1. Experimental section**

##### **1.1 Materials and Instruments**

All the chemicals were purchased commercially and used without further purification. The elemental analyses of C, H and N were performed on an Elementar Vario EL III microanalyzer. The FT-IR spectra were obtained on a VERTEX70 spectrophotometer using KBr disks in the range 4000–400 cm<sup>-1</sup>. <sup>1</sup>H NMR (400 MHz) and <sup>13</sup>C NMR (101 MHz) spectra were recorded on a Bruker AVANCE 400 NMR spectrometer with Me<sub>4</sub>Si as the internal standard in deuterated solvent DMSO-d<sub>6</sub>. ESI mass spectra were recorded on a DECAX-30000 LCQ Deca XP mass spectrometer. Powdered X-ray diffraction (PXRD) patterns were performed on a Rigaku Miniflex II diffractometer using Cu-K $\alpha$  radiation ( $\lambda = 1.540598 \text{ \AA}$ ) at 40 kV and 40 mA in the range of  $5 \leq 2\theta \leq 60^\circ$ . Thermogravimetric analysis (TGA/DSC) experiments were done on a TGA/DSC 1 merriker toledo thermogravimetric analyzer in N<sub>2</sub> with the sample heated in an Al<sub>2</sub>O<sub>3</sub> crucible at a heating rate of 10 K min<sup>-1</sup>. Simulated PXRD patterns were derived from the Mercury Version 1.4 software (<http://www.ccdc.cam.ac.uk/products/mercury/>). The photoluminescence (PL) and lifetime determination were conducted on a single-grating Edinburgh FL920 fluorescence

spectrometer equipped with a 450 W Xe lamp, an nF900 lamp, and a PMT detector. The CIE coordinates, was calculated using the CIE calculator-version 3 software. The impact and friction sensitivities were performed on a BAM fall hammer BFH-12 and a BAM friction apparatus FSKM-10, respectively. The combustion heats were measured by oxygen bomb calorimetry (5E-AC8018, Changsha Kaiyuan Instruments Co., LTD, China).

## 1.2 Synthesis

**Synthesis of 1-(2-cyanoethyl) piperidine-4-carboxylic acid (HCPC).** A mixture of piperidine-4-carboxylic acid (0.025 mol, 3.23g), NaOH (0.025 mol, 1.00g) and acrylonitrile (1.33 g, 0.025 mol) in 20mL H<sub>2</sub>O was stirred for 10min, and then standing for one day at room temperature. After that, 0.025 mol HCl (m%=37.5) was poured into the reaction mixture and then heat to 70 °C to evaporate the solution. Finally, pale yellow precipitates were obtained and the yield is about 63% (based on the piperidine-4-carboxylic acid). ESI-MS: m/z [M – H]<sup>–</sup>, 181.2 (calcd for C<sub>9</sub>H<sub>14</sub>N<sub>2</sub>O<sub>2</sub>, 182.2). NMR analysis for HCPC, <sup>1</sup>H NMR (400 MHz, DMSO): <sup>1</sup>H NMR (400 MHz, DMSO): δ 2.78 (d, *J* = 11.3 Hz, 2H), 2.63 (t, *J* = 6.6 Hz, 2H), 1.99 (dd, *J* = 26.9, 15.6 Hz, 2H), 1.74 (d, *J* = 10.7 Hz, 1H), 1.50 (dd, *J* = 20.9, 11.3 Hz, 2H). <sup>13</sup>C NMR (101 MHz, DMSO): δ 178.21 (s), 120.52 (s), 53.50 (s), 52.68 (s), 41.92 (s), 28.86 (s), 15.44 (s). Anal. Calcd for C<sub>9</sub>H<sub>14</sub>N<sub>2</sub>O<sub>2</sub>: C, 59.75; H, 8.11; N, 15.58 %. Found: C, 59.32; H, 7.74; N, 15.37%. Selected IR (KBr pellet, cm<sup>–1</sup>): 3436 b, 2950 w, 2254 w, 1644 m, 1571 s, 1456w, 1408 s, 1126 w, 934 w, 787 w (Fig. S1).

**Synthesis of [Zn<sub>4</sub>(N<sub>3</sub>)<sub>0.8</sub>(OH)<sub>1.2</sub>(BTEC)(HTZPC)<sub>2</sub>(H<sub>2</sub>O)<sub>2</sub>] 3.25H<sub>2</sub>O** A mixture of ZnCl<sub>2</sub> (0.73mmol, 100 mg), HCPC (0.55mmol, 100 mg), H<sub>4</sub>BTEC (0.20mmol, 50 mg), NaN<sub>3</sub> (1.54mmol, 100 mg) and H<sub>2</sub>O (8 mL) was sealed in a poly(tetrafluoroethylene)-lined stainless steel container under autogenous pressure and then heated to 90 °C for 3 days, and cooled to

room temperature at a rate of 2.5 °C/h. Orange block crystals suitable for X-ray analysis were obtained. Yield: 90%. For **1**: Anal. calcd for C<sub>28</sub>H<sub>41.7</sub>N<sub>12.4</sub>O<sub>18.45</sub>Zn<sub>4</sub>: Zn, 23.59; C, 30.32; H, 3.79; N, 15.66%. Found: Zn, 21.46; C, 30.47; H, 3.80; N, 15.67%. Selected IR (KBr pellet, cm<sup>-1</sup>): 3437 b, 3024 w, 2749 w, 1578 vs, 1497 s 1434 s, 1376s, 1209 m, 1130 m, 1030 m, 941 m, 877 m, 822 m, 563 s.

### 1.3 X-ray Crystallography

Single-crystal X-ray diffraction measurements was performed on a Rigaku Saturn724 CCD, which was equipped with Mo  $K_{\alpha}$  radiation ( $\lambda = 0.71073$  Å), using the  $\omega$ -scan technique for collection of the intensity data sets. The Primitive structures were solved by the direct methods reduced by CrystalClear software<sup>1</sup>. Subsequent successive difference Fourier syntheses yielded the other non-hydrogen atoms. The hydroxyl O and terminal azido N atoms locate at the same position, labelled as X atom, in which the  $\mu_2\text{-OH}^-/\mu_{1,1}\text{-N}_3^-$  occupancy rate is 6:4. The coordinated water O2W has a certain degree of disorder, and the site occupancy ratio for O2WA/O2WB is 8:2. Hydrogen atoms attached to C atoms of HTZPC ligands were added geometrically and refined using the riding model. Hydrogen atoms attached to N15 atoms of HTZPC ligand are revealed according to the difference-Fourier map. In this heavy-atom structure as it was not possible to see clear electron-density peaks in difference maps which would correspond with acceptable locations for the various H atoms bonded to water oxygen atoms, the refinement was completed with no allowance for these water H atoms in the model. Final structures were refined using a full-matrix least-squares refinement on  $F^2$ . All of the calculations were performed by the Siemens SHELXTL version 5 package of crystallographic software<sup>2</sup>. Pertinent crystal data and structural refinement results and selected bond distances and angles for **1** are listed in [Tables S1](#) and [S2](#), respectively.

### Notes and references

1. CrystalClear, version 1.35; Software User's Guide for the Rigaku R-Axis, and Mercury and Jupiter CCD Automated X-ray Imaging System; Rigaku Molecular Structure Corporation: Utah, **2002**.
2. SHELXTL Reference Manual, version 5; Siemens Energy & Automation Inc.: Madison, WI, **1994**.

## 2. Table section

**Table S1** Crystal data and structure refinement for compound **1**

| Compound                     | <b>1</b>                                                                                 |
|------------------------------|------------------------------------------------------------------------------------------|
| Empirical formula            | C <sub>28</sub> H <sub>41.70</sub> N <sub>12.40</sub> O <sub>18.45</sub> Zn <sub>4</sub> |
| $M_r$ (g mol <sup>-1</sup> ) | 1108.72                                                                                  |
| Crystal system               | tetragonal                                                                               |
| Space group                  | <i>P</i> -4                                                                              |
| $a$ (Å)                      | 14.952(2)                                                                                |
| $b$ (Å)                      | 14.952(2)                                                                                |
| $c$ (Å)                      | 9.0826(18)                                                                               |
| $\alpha$ (°)                 | 90                                                                                       |
| $\beta$ (°)                  | 90                                                                                       |
| $\gamma$ (°)                 | 90                                                                                       |
| $V$ (Å <sup>3</sup> )        | 2030.5(7)                                                                                |
| $Z$                          | 2                                                                                        |
| $D_c$ / g cm <sup>-3</sup>   | 1.813                                                                                    |
| $\mu$ / mm <sup>-1</sup>     | 2.426                                                                                    |
| $F(000)$                     | 1128.0                                                                                   |
| Reflections collected        | 21606                                                                                    |
| Unique Reflections           | 4655                                                                                     |
| $GOF$                        | 1.007                                                                                    |
| $R_1^a$ [ $I > 2\sigma(I)$ ] | 0.0393                                                                                   |
| $wR_2^b$ (all data)          | 0.1033                                                                                   |
| CCDC No.                     | 1471950                                                                                  |

$$^a R_1 = \sum(F_o - F_c)/\sum F_o; ^b wR_2 = [\sum w(F_o^2 - F_c^2)^2/\sum w(F_o^2)^2]^{1/2}$$

**Table S2** Selected bond lengths (Å) and angles (°) for compound **1**

| <b>1</b>              |           |                     |           |
|-----------------------|-----------|---------------------|-----------|
| Zn(1)–O(22)           | 2.030(6)  | Zn(2)–X             | 2.00(4)   |
| Zn(1)–O(23)#1         | 2.027(6)  | Zn(2)–O(11)         | 2.023(9)  |
| Zn(1)–N(11)#2         | 2.047(7)  | Zn(2)–O(12)#3       | 2.039(8)  |
| Zn(1)–N(14)           | 2.076(7)  | Zn(2)–O(2W)         | 2.100(11) |
|                       |           | Zn(2)–X#3           | 2.06(4)   |
| O(22)–Zn(1)–O(23)#1   | 138.0(2)  | X#3–Zn(2)–O(11)     | 88.8(8)   |
| O(22)–Zn(1)–N(11)#2   | 102.9(3)  | X–Zn(2)–O(12)#3     | 101.7(8)  |
| O(23)#1–Zn(1)–N(11)#2 | 107.1(3)  | O(12)#3–Zn(2)–X#3   | 90.1(7)   |
| O(22)–Zn(1)–N(14)     | 101.7(3)  | O(12)#3–Zn(2)–O(11) | 161.1(4)  |
| O(23)#1–Zn(1)–N(14)   | 103.6(3)  | X–Zn(2)–O(2W)       | 98.8(11)  |
| N(11)#2–Zn(1)–N(14)   | 95.9(3)   | X#3–Zn(2)–O(2W)     | 143.3(10) |
| X–Zn(2)–X#3           | 118.0(18) | O(11)–Zn(2)–O(2W)   | 87.9(5)   |
| X–Zn(2)–O(11)         | 95.5(7)   | O(12)#3–Zn(2)–O(2W) | 81.7(4)   |

Symmetry transformations used to generate equivalent atoms: for **1**: (#1)  $x, y, z + 1$ ; (#2)  $y, -x, -z + 2$ ; (#3)  $-y + 1, x, -z$ .

### 3. Figure section

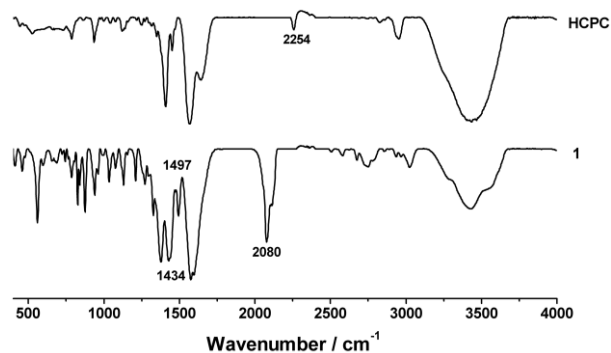

**Fig. S1** IR spectra of HCPC ligand and compound **1**.

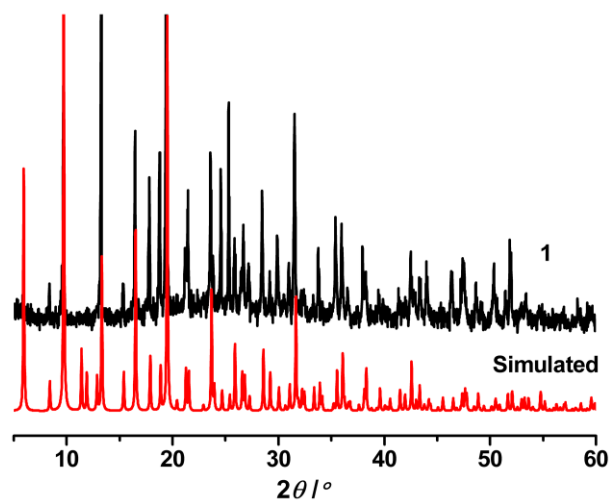

**Fig. S2** Comparison between PXRD patterns for the as-synthesized **1** and the simulated one from single-crystal X-ray data.

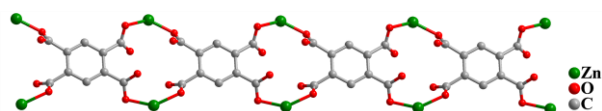

**Fig. S3** The 1D chain constructed by the Zn1 atom and BTEC<sup>4-</sup> ligand.

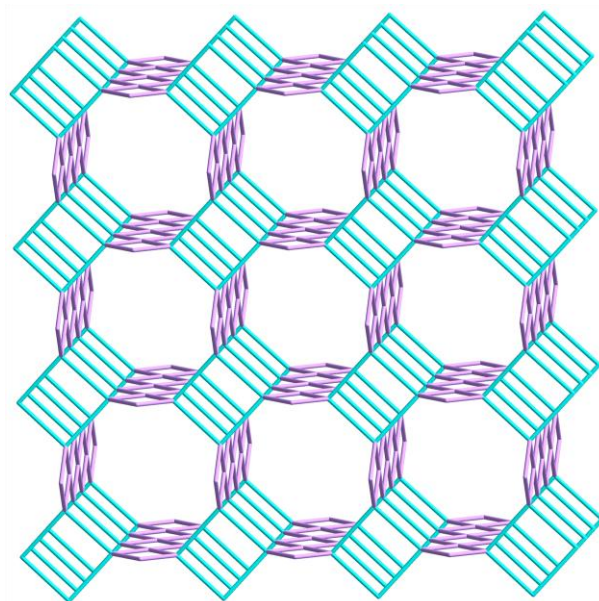

**Fig. S4** 3D mot-e type net (the BTEC<sup>4-</sup> ligand and Zn1 atoms are regarded as square and tetrahedral 4-c vertices, respectively and the tetrazolate group as a linker bridging two Zn atoms)

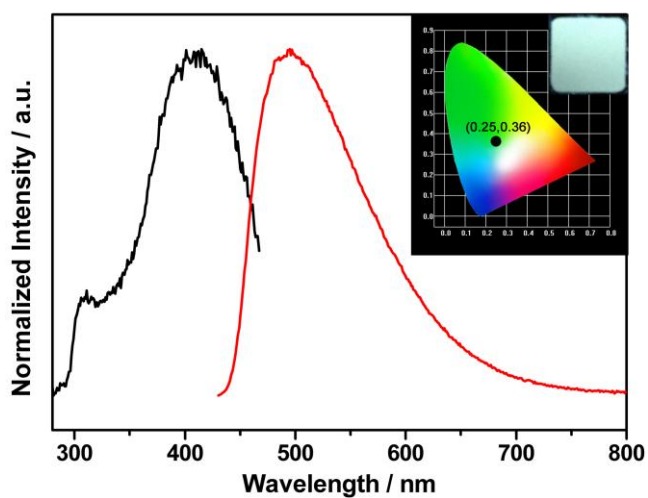

**Fig. S5** The excitation (black line) and emission (red line) spectra of **1**. Insert: the 1931 CIE chromaticity diagram and optical image of the emission in the powdered sample.

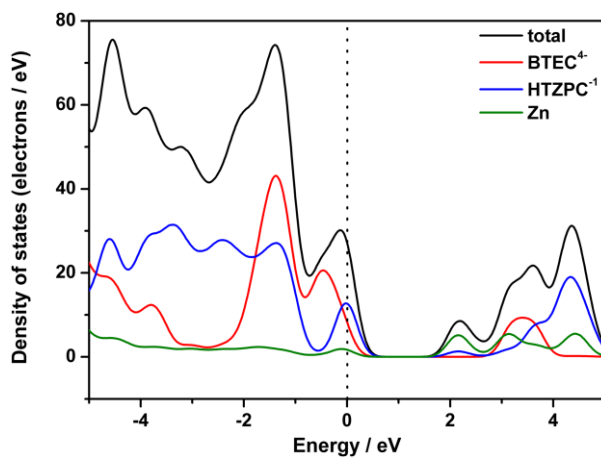

**Fig. S6** The total and partial DOS of compound **1**. The position of the Fermi level is set at 0 eV.

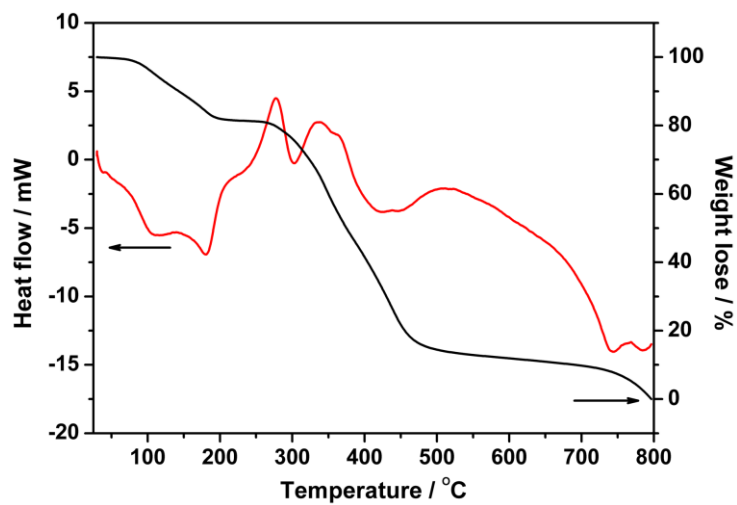

**Fig. S7** DSC and TGA curves of compound **1**.
